# Supplementary material
Source: bioRxiv or medRxiv preprint supplement (https://www.biorxiv.org/highwire/filestream/77749/field_highwire_adjunct_files/0/253146-1.pdf)

1

2 **Metabarcoding analysis on European coastal samples**  
3 **reveals new molecular metazoan diversity**

4

5 David López-Escardó<sup>1</sup>, Jordi Paps<sup>2</sup>, Colomán de Vargas<sup>3,4</sup>, Ramon Massana<sup>5</sup>, Iñaki  
6 Ruiz-Trillo<sup>1,6,7\*</sup>, Javier del Campo<sup>1,8\*</sup>

7 **Supplementary Materials and Methods**

8 *Sampling, 454 sequencing and curation of the sequences*

9 During the BioMarKs project (biomarks.eu), samples were collected in six European  
10 coastal sites: the North Sea (Oslo, Norway), the English Channel (Roscoff, France),  
11 the Bay of Biscay (Gijón, Spain), the Mediterranean Sea (Blanes, Spain, and Naples,  
12 Italy) and the Black Sea (Varna, Bulgaria). Water column samples were taken with  
13 Niskin bottles attached to a CTD rosette at surface and deep chlorophyll maximum  
14 depths. Twenty liters of water per sample were pre-filtered through 20 µm filters and  
15 then sequentially filtered through 3µm and 0.8µm polycarbonate filters (diameter:  
16 142mm) using a peristaltic pump. Filtration time did not surpass 30min to avoid RNA  
17 degradation. For dissolved DNA, 20 liters of 0.2 µm-filtered seawater was mixed with  
18 400 ml of 0.5% CTAB (cetyltrimethylammonium bromide) (pH = 8) for 5 h and  
19 filtered through 0.2 µm polycarbonate membranes (142 mm). To collect the micro-  
20 (20– 200 µm) and meso- (200–2000 µm) planktonic fractions (micro/mesoplankton),  
21 a plankton net of 20 µm mesh size was towed for 5–15 min, and the large protists

22 collected were rinsed with 0.2 µm-filtered seawater, passed through a 2000 µm  
23 metallic sieve and filtered with 12µm PC membranes (47 mm). Filters were flash  
24 frozen and stored at -80°C. Sediment samples were taken with sediment cores and  
25 small aliquots were frozen at -80°C (Table S1). The total number of samples  
26 considered in this study was 137 (Table S2). Total DNA and RNA were extracted at  
27 the same time from the same filter using the NucleoSpin RNA L kit (Macherey-  
28 Nagel, Düren, Germany). After quantification with a Nanodrop ND-1000  
29 spectrophotometer (NanoDrop Technologies Inc, Wilmington, DE, USA), the quality  
30 was further checked on a 1.5% agarose gel. Contaminating DNA was removed from  
31 RNA samples using the TurboDNA kit (Ambion, Carlsbad, CA, USA). Extracted  
32 RNA was immediately reverse transcribed using the RT Superscript III random  
33 primers kit (Invitrogen, Carlsbad, CA, USA). The universal primers  
34 TAReuk454FWD1 (50-CCAGCASCYGCGGTAATTCC-30) and TAReukREV3  
35 (50-ACTTTCGTTCTTGATYRA-30) were used to amplify the V4 region (~380 bp)  
36 of the eukaryotic 18S rDNA (1). Primers were adapted for 454 following the  
37 manufacturer's specifications. They had the configuration A-adapter-tag (7 or 8bp)-  
38 forward primer and B-adapter-reverse primer. PCRs were performed as explained in  
39 Logares et al. 2012 (2), where amplifications were done in a volume of solution of  
40 25ml and consisted on a 1x MasterMix Phusion High-Fidelity DNA Polymerase  
41 (Finnzymes, Espoo, Finland), 0.35 mM of each primer and 3% DMSO. 5ng of  
42 template DNA/cDNA was added to each PCR sample. PCRs cycles started with a  
43 denaturation step at 98°C for 30s, followed by 10 cycles of 10 s at 98 °C, 30s at 53 °C  
44 and 30s at 72°C, and afterwards by 15 cycles of 10 s at 98 °C, 30s at 48°C and 30s at  
45 72 °C. Amplicons were evaluated in a 1.5% agarose gel to check for successful  
46 amplifications. Triplicate amplicons were pooled and purified using the NucleoSpin

47 Extract II (Macherey-Nagel). Purified amplicons were eluted in 30 ml of elution  
48 buffer and quantified again using a Nanodrop ND-1000 spectrophotometer. The final  
49 number of pooled amplicons for 454 tag- sequencing was approximately 5mg.  
50 Amplicon sequencing was carried out on a 454 GS FLX Titanium system (454 Life  
51 Sciences, Branford, CT, USA) installed at Genoscope  
52 (<http://ig.cea.fr/drf/ig/Pages/Genoscope.aspx>, France). Pyroreads were inspected to  
53 remove short reads, reads with low quality and chimeras, as described in Massana et  
54 al. 2015 (3) (Table S2).

### 55 *Taxonomic affiliation of the OTUs*

56 OTUs were taxonomically filtered using several eukaryotic reference datasets in order  
57 to discard non-metazoan sequences (4, 5). Afterwards, we used our own metazoan  
58 reference dataset manually curated by phylogeny to annotate the metazoan sequences  
59 (available at figshare <https://dx.doi.org/10.6084/m9.figshare.3475007.v1>). With the  
60 exception of the supergroups Arthropoda, Chordata and Annelida, in which the  
61 database was also phylogenetically curated at the subphylum level, the phylogenetic  
62 tree built to determine the taxonomic affiliation only confirmed assignment at the  
63 phylum level. OTUs were primarily assigned to a group when they had an e-value  
64 below  $10^{-100}$  against a reference sequence. Additionally, OTUs with higher BLAST e-  
65 values and represented by more than 100 reads from three or more samples were also  
66 considered if they were phylogenetically placed within metazoans by performing  
67 Maximum likelihood trees through RAxML 7.2.8 (6) . We ended with 372,934  
68 representative metazoan reads and 1076 OTUs from 137 samples (Table S2), 103  
69 distinct samples, 34 of them in duplicate (same RNA/DNA extraction but separate  
70 PCR and sequencing reactions).

71 *Reproducibility of PCR and 454 sequencing*

72 In order to evaluate the reproducibility of the different replicates, we selected  
73 duplicated samples from different templates (8 DNA, 9 RNA), different sampling  
74 sites (2 Barcelona, 7 Naples and 8 Oslo), in which at least one of the duplicates  
75 contain more than 100 metazoan reads (n=17). Each duplicate (same nucleic acid  
76 template and separate PCR and 454 sequencing) was selected from our 34 duplicated  
77 samples out of 137. We calculated the linear regressions by plotting OTU abundances  
78 in each duplicate (3). The pyroread ratio between duplicates varied from 0.01 to 0.94.  
79 We plotted the statistics of linear regression, R<sup>2</sup> coefficients and regression slopes,  
80 over the pyroread ratio between duplicates (Fig. S8). R<sup>2</sup> coefficients (Fig. S8) were  
81 high (0.91 on average) and independent of pyrotag ratios. Thus, we confirmed that the  
82 read distribution among different OTUs were found at similar relative abundances in  
83 each duplicate. Slopes regression and pyroread ratio present a linear growth (R<sup>2</sup> of  
84 0.95; slope of 0.97), confirming that OTU abundances increased proportionally with  
85 the number of pyrotags in the sample as described in Massana et al. 2015 (3).

86 *Diversity and distribution analysis*

87 The metazoan OTU table obtained was processed for community analysis using  
88 QIIME (7). Beta-diversity analyses including PCA and Jackknife clustering were  
89 performed with Unifrac (8). The OTU tree used as input for Unifrac was constructed  
90 after aligning the OTUs with Mothur (9). A subset of aligned sequences from our  
91 homemade database was used as a reference for Mothur input. Then, a maximum  
92 likelihood tree was generated with RAxML 7.2.8 and using GTRCATI as the  
93 evolutionary model. A hundred repeated runs on distinct starting trees were carried

94 out to select the tree with the best topology and 100 bootstrap replicates were  
95 performed using the same evolutionary model.

96 *Phylogenetic and diversity analysis of BioMarks V4 sequence tags belonging to a*  
97 *novel metazoan group*

98 In order to phylogenetically place the short reads assigned to the novel metazoan  
99 group (MAME 1; MArine METazoan group 1), we performed a RAxML-EPA analysis  
100 (10). First, we built a metazoan reference tree using the longest putative MAME 1  
101 sequence (1878 bp) found by BLAST at NCBI nt nr database (KC582969), as a  
102 unique MAME 1 representative. Metazoan 18S rRNA gene sequences were  
103 downloaded from GenBank (Table S3) and aligned using a MAFFT 7 E-INS-i  
104 strategy (11). The resulting alignment was checked by eye with Geneious 8.0.4 (12),  
105 and the ambiguously aligned positions deleted, resulting in a total of 1472 nucleotide  
106 positions. Bayesian inference analysis was conducted with MrBayes 3.2.6 (13) using  
107 the GTR + $\Gamma$  +invariant model of evolution running 6,000,000 generations. Maximum  
108 likelihood trees were generated with RAxML 7.2.8, using GTRCATI as the  
109 evolutionary model. To place the MAME 1 group within tunicates, an additional  
110 alignment was constructed with all tunicate sequences available and a phylogenetic  
111 tree was inferred using the same strategy. Tunicate sequences were mostly taken from  
112 Tsagkogeorga et al. 2009 (14) who had an alignment of 110 sequences (95 from  
113 tunicates) occupying 1746 nucleotide positions. All the alignments and trees are  
114 available at figshare (<https://dx.doi.org/10.6084/m9.figshare.3475007.v1>).

115 Next, we searched for MAME 1 – like sequences in other metabarcoding studies. In  
116 particular, we downloaded 487 marine environmental 18S amplicon datasets from  
117 NCBI's SRA (March 2016) using fastq-dump from SRA-toolkit with -R option,

118 which selects the high quality reads (SRA Handbook). We performed a BLAST  
119 search over the SRA dataset using KC582969 as a query and an e-value cut-off of e-  
120 100, retrieving 3677 putative MAME 1 reads from 104 SRA runs. Before processing  
121 them, we used PEAR (16) to merge all the Illumina pair-end reads retrieved. Next, we  
122 used usearch v8.1.861 for quality filtering, dereplication, clustering (97%) and  
123 chimera checking using SILVA SSU 119 (5) as a reference. We ended up with 14  
124 putative MAME 1 OTUs representing 3597 reads. We also performed a BLAST  
125 search (cut-off e value of e-10) against the Tara Oceans database (17), retrieving 58  
126 putative MAME 1 OTUs representing 123,779 reads.

127 We aligned all the MAME 1 – like short-read OTUs retrieved in the previous step and  
128 the ones from BioMarks with the representative sequences used for the metazoan and  
129 tunicate reference trees using the MAFFT strategy described earlier. After discarding  
130 sequences that did not align properly, we ended up with 69 MAME 1 OTUs (3 from  
131 BioMarKs, 14 from SRA and 52 from TARA), as well as the NCBI sequences  
132 KC582969 and HQ869055. Ambiguous positions were removed from the alignment  
133 checked by eye with Geneious 8.0.4 (12). The metazoan alignment yielded 1514  
134 nucleotide positions, while the tunicate-specific alignment generated 1707 positions.  
135 Finally, we used RAxML-EPA to place the short reads in both the metazoan and the  
136 tunicate-specific datasets.

137 After the OTU assignments, we built an OTU table with the 69 MAME 1 group  
138 OTUs. We used QIIME to analyze their read abundance and distribution across  
139 different geographical locations, depths and size fractions. The OTU table and all the  
140 alignments and trees are available as supplementary information at figshare  
141 (<https://dx.doi.org/10.6084/m9.figshare.3475007.v1>).

142 **Supplementary References**

- 143 1. Stoeck T, et al. (2010) Multiple marker parallel tag environmental DNA  
144 sequencing reveals a highly complex eukaryotic community in marine anoxic  
145 water. *Mol Ecol* 19(Suppl. 1):21–31.
- 146 2. Logares R, et al. (2012) Diversity patterns and activity of uncultured marine  
147 heterotrophic flagellates unveiled with pyrosequencing. *ISME J* 6(10):1823–  
148 1833.
- 149 3. Massana R, et al. (2015) Marine protist diversity in European coastal waters  
150 and sediments as revealed by high-throughput sequencing. *Environ Microbiol*  
151 17(10):4035–4049.
- 152 4. Guillou L, et al. (2013) The Protist Ribosomal Reference database (PR2): A  
153 catalog of unicellular eukaryote Small Sub-Unit rRNA sequences with curated  
154 taxonomy. *Nucleic Acids Res* 41(D1):597–604.
- 155 5. Quast C, et al. (2013) The SILVA ribosomal RNA gene database project:  
156 improved data processing and web-based tools. *Nucleic Acids Res*  
157 41(D1):D590–D596.
- 158 6. Stamatakis A (2006) RAxML-VI-HPC: maximum likelihood-based  
159 phylogenetic analyses with thousands of taxa and mixed models.  
160 *Bioinformatics* 22(21):2688–2690.
- 161 7. Caporaso JG, et al. (2010) QIIME allows analysis of high-throughput  
162 community sequencing data. *Nat Methods* 7(5):335–336.
- 163 8. Hamady M, Lozupone CA, Knight R (2010) Fast UniFrac: facilitating high-

- 164 throughput phylogenetic analyses of microbial communities including analysis  
165 of pyrosequencing and PhyloChip data. *ISME J* 4(1):17–27.
- 166 9. Schloss PD, et al. (2009) Introducing mothur: Open-source, platform-  
167 independent, community-supported software for describing and comparing  
168 microbial communities. *Appl Environ Microbiol* 75(23):7537–7541.
- 169 10. Berger SA, Krompass D, Stamatakis A (2011) Performance, accuracy, and  
170 Web server for evolutionary placement of short sequence reads under  
171 maximum likelihood. *Syst Biol* 60(3):291–302.
- 172 11. Katoh K, Misawa K, Kuma K, Miyata T (2002) MAFFT: a novel method for  
173 rapid multiple sequence alignment based on fast Fourier transform. *Nucleic  
174 Acids Res* 30(14):3059–3066.
- 175 12. Kearse M, et al. (2012) Geneious Basic: An integrated and extendable desktop  
176 software platform for the organization and analysis of sequence data.  
177 *Bioinformatics* 28(12):1647–1649.
- 178 13. Ronquist F, et al. (2012) Mrbayes 3.2: Efficient bayesian phylogenetic  
179 inference and model choice across a large model space. *Syst Biol* 61(3):539–  
180 542.
- 181 14. Tsagkogeorga G, et al. (2009) An updated 18S rRNA phylogeny of tunicates  
182 based on mixture and secondary structure models. *BMC Evol Biol* 16(9:187):1–  
183 16.
- 184 15. SRA Handbook Available at: <https://www.ncbi.nlm.nih.gov/books/NBK47528/>  
185 [Accessed March 1, 2016].



- 186 16. Zhang J, Kobert K, Flouri T, Stamatakis A (2014) PEAR: A fast and accurate  
187 Illumina Paired-End reAd mergeR. *Bioinformatics* 30(5):614–620.
- 188 17. de Vargas C, et al. (2015) Eukaryotic plankton diversity in the sunlit ocean.  
189 *Science* 348(6237):1261605–1261605.
- 190 18. Paps J, Baguña J, Riutort M (2009) Lophotrochozoa internal phylogeny: new  
191 insights from an up-to-date analysis of nuclear ribosomal genes. *Proc R Soc B*  
192 *Biol Sci* 276(1660):1245–1254.
- 193 19. Paps J, Baguña J, Riutort M (2009) Bilaterian phylogeny: A broad sampling of  
194 13 nuclear genes provides a new lophotrochozoa phylogeny and supports a  
195 paraphyletic basal acoelomorpha. *Mol Biol Evol* 26(10):2397–2406.
- 196 20. Zhang Z-QQ (2013) Animal biodiversity: An update of classification and  
197 diversity in 2013. *Zootaxa* 3703(1):5.

## 198 **Supplementary Figure Legends and Tables**

199 **Fig. S1: BioMarKs sampling sites.** Map indicating the sampling locations where the  
200 data were collected and the summary of the dataset characteristics. Map retrieved  
201 from Wikimedia Commons  
202 ([https://commons.wikimedia.org/wiki/File:Blank\\_map\\_Europe\\_without\\_borders.png](https://commons.wikimedia.org/wiki/File:Blank_map_Europe_without_borders.png))  
203 CC-BY-SA-4.0,3.0,2.5,2.0,1.0 (<https://creativecommons.org/licenses/by-sa/4.0/>).

204 **Fig. S2: Box plot distribution of relative metazoan abundance compared with all**  
205 **eukaryotes.** Relative abundance of metazoans compared to all eukaryotes in (a)  
206 different oxic pelagic fractions, (b) different sites and in (c) different depths. Note that  
207 data is provided from just one sample in the anoxic sediments.

208 **Fig. S3: Jackknife clustering analysis of phylogenetic composition of the samples.**  
209 The chart represents the relative abundance within metazoan phyla in each sample.  
210 Samples from extracellular DNA and the ones with less than 100 reads (DNA+RNA)  
211 were removed from the analysis.

212 **Fig. S4: Principal component analysis of the samples.** Samples from extracellular  
213 DNA and the ones with less than 100 reads (DNA+RNA) were removed from this  
214 analysis. Analyses are shown for (a) size fraction, (b) depth and (c) site.

215 **Fig. S5: MAME 1 phylogenetic position and ecological distribution.** (a) Metazoan  
216 18S rRNA phylogenetic tree placing the novel metazoan group MAME 1. The tree  
217 was inferred using RaxML-EPA from the 18S rRNA gene sequence including  
218 representatives from all metazoan groups. Metazoan super-group nomenclature is  
219 based on Paps et al. 2009a and b (18, 19). The nodal support values marked with a  
220 dot correspond to maximum likelihood 100-replicate bootstrap support and Bayesian  
221 posterior probabilities. (b) Worldwide distribution of MAME 1 group. World map  
222 within BioMarks data or within public repositories. Dot size represents the number of  
223 reads found shown on a log<sub>2</sub> scale. Bar charts show the distribution of MAME 1 reads  
224 by depth and fraction.

225 **Fig. S6: Read distribution of shared OTUs among water column and benthic**  
226 **environments.** Each dot represents an OTU. Axes indicate whether reads belong to  
227 the water column or the sediment. Colors indicate the taxonomy of the OTU.

228 **Fig. S7: Comparison of number of OTUs found, number of described metazoan**  
229 **species and number of 18S rRNA metazoan sequences in NCBI.** (a) Total number  
230 of OTUs from 18S rRNA retrieved in our dataset (blue bars) compared to the number  
231 of described species for each metazoan phylum (20) (red bars). (b) Total number of  
232 OTUs from 18S rRNA retrieved from Genbank (blue bars) compared to the number of  
233 described species for each metazoan phylum (20) (red bars). The number of 18S  
234 rRNA sequences from NCBI was obtained from the following search for each  
235 phylum: "*txid33208[Organism:exp] (18S OR SSU) NOT (mitochondrial OR*  
236 *mitochondria)*". (B) MAME 1 distribution.

237 **Fig. S8: Linear regression statistics of the read distribution between the**  
238 **duplicated samples analysed (n=17).** The figure shows on the Y axis R<sup>2</sup> coefficients  
239 (blue dots) and slope values (read dots) plotted over the pyroread ratio between  
240 duplicates (X axis).

241 **Table S1.** Description of the sampling sites.

242

| Site               | Coordinates            | Distance to coast (Km) | Max. Depth (m) <sup>1</sup> | Sampling date | DCM (m) | Temperature Surface (°C) | Temperature DCM (°C) | Temperature Sediment (°C) | Salinity Surface (PSU) | Salinity Sediment (PSU) | Chla (µg/l) <sup>2</sup> | [NO <sub>3</sub> ] <sup>-</sup> Surface/DCM (µg/l) | [PO <sub>4</sub> <sup>3-</sup> ] Surface/DCM (µg/l) | Total Phosphorus Surface/DCM (µg/l) |
|--------------------|------------------------|------------------------|-----------------------------|---------------|---------|--------------------------|----------------------|---------------------------|------------------------|-------------------------|--------------------------|----------------------------------------------------|-----------------------------------------------------|-------------------------------------|
| <b>Blanes</b>      | 41° 40' N<br>2° 48' E  | 1.0                    | 20                          | 2/2010        | N/A     | 12.5                     | N/A                  | 12.6                      | 37.5                   | 38.2                    | 1.0                      | 2 / N/A                                            | 7 / N/A                                             | 13 / N/A                            |
| <b>Gijon</b>       | 43° 40' N<br>5° 35' W  | 12.0                   | 110                         | 9/2010        | 40      | 20.2                     | 14.0                 | 12.0                      | 35.7                   | 36.6                    | 7.0                      | 2 / 26                                             | 3 / 4                                               | 10 / 12                             |
| <b>Naples 2009</b> | 40° 48' N<br>14° 15' E | 4.0                    | 75                          | 10/2010       | 23      | 22.8                     | 22.4                 | 14.6                      | 37.7                   | 37.9                    | 1.4                      | 16 / 0                                             | 1 / 1                                               | 22 / 16                             |
| <b>Naples 2010</b> | 40° 48' N<br>14° 15' E | 4.0                    | 76                          | 5/2010        | 35      | 19.2                     | 15.5                 | 14.0                      | 37.2                   | 37.9                    | 1.2                      | <2 / <2                                            | 4 / 3                                               | 14 / 8                              |
| <b>Oslo 2009</b>   | 59° 16' N<br>10° 43' E | 1.5                    | 100                         | 09/2010       | 8       | 15.0                     | 15.0                 | 8.0                       | 25.0                   | 35.0                    | 3.2                      | 9 / 1                                              | 4 / 3                                               | 22 / 21                             |
| <b>Oslo 2010</b>   | 59° 16' N<br>10° 43' E | 1.5                    | 100                         | 06/2010       | 9       | 15.0                     | 12.5                 | 6.0                       | 22.0                   | 35.0                    | 1.9                      | <2 / <2                                            | 3 / 2                                               | 12 / 11                             |
| <b>Roscoff</b>     | 48° 46' N<br>3° 57' W  | 5.0                    | 60                          | 4/2010        | N/D     | 9.9                      | N/D                  | 9.9                       | 34.9                   | 34.9                    | 0.5                      | 87 / N/D                                           | 12 / N/D                                            | 29 / (N/D)                          |
| <b>Varna</b>       | 43° 10' N<br>28° 50' E | 40.0                   | 400                         | 5/2010        | 40      | 21.5                     | 9.5                  | 8.5                       | 16.0                   | 22.0                    | 8.0                      | 2 / 2                                              | 4 / 3                                               | 11 / 11                             |

243 Surface is considered as < 5 m depth. N/A= not applicable, N/D= no data.

244 <sup>1</sup> Maximum depth of the water column.

245 <sup>2</sup> Maximum Chlorophyll a concentration in the water column measured with fluorometry (fluorometer attached to a CTD).

**Table S26** Summary of samples including the total number of eukaryotic reads after quality control and the total number of metazoan reads after all the filtering process and the OTU assignment.

248

| Description                                     | All eukaryotes |             |           |           | Metazoans |             |           |           |
|-------------------------------------------------|----------------|-------------|-----------|-----------|-----------|-------------|-----------|-----------|
|                                                 | Samples        | Total reads | DNA reads | RNA reads | Samples   | Total reads | DNA reads | RNA reads |
| <b>Site</b>                                     |                |             |           |           |           |             |           |           |
| Blanes                                          | 11             | 94366       | 48813     | 45553     | 11        | 59626       | 35719     | 23907     |
| Gijon                                           | 4              | 50178       | 29116     | 21062     | 4         | 233         | 199       | 34        |
| Naples                                          | 46             | 600756      | 266549    | 334207    | 44        | 131168      | 70170     | 60998     |
| Oslo                                            | 44             | 406563      | 224876    | 181687    | 44        | 93635       | 60637     | 32998     |
| Roscoff                                         | 9              | 55567       | 41861     | 13706     | 9         | 17127       | 14731     | 2396      |
| Varna                                           | 25             | 250977      | 122751    | 132006    | 25        | 71145       | 39550     | 31595     |
| <b>Size Fraction (<math>\mu\text{m}</math>)</b> |                |             |           |           |           |             |           |           |
| 0-0.2 (eDNA)                                    | 8              | 44564       | 44564     | n/a       | 8         | 7879        | 7879      | n/a       |
| 0.8-3                                           | 38             | 439410      | 208067    | 231343    | 38        | 37575       | 22981     | 14594     |
| 3-20                                            | 36             | 394879      | 194915    | 199964    | 36        | 23570       | 15949     | 7621      |
| 20-2000                                         | 33             | 379910      | 187405    | 192505    | 31        | 222149      | 127190    | 94959     |
| <b>Depth</b>                                    |                |             |           |           |           |             |           |           |
| Subsurface                                      | 63             | 624138      | 336875    | 287263    | 23        | 81761       | 46996     | 34765     |
| DCM                                             | 45             | 536884      | 262120    | 274764    | 62        | 134470      | 85545     | 48925     |
| Anoxic                                          | 7              | 101004      | 37328     | 63676     | 45        | 105932      | 63027     | 42905     |
| Sediments                                       | 24             | 216013      | 111294    | 104409    | 7         | 50771       | 25438     | 25333     |
| <b>Template</b>                                 |                |             |           |           |           |             |           |           |
| DNA                                             | 74             | 746245      | n/a       | n/a       | 72        | 220766      | n/a       | n/a       |
| RNA                                             | 65             | 728221      | n/a       | n/a       | 65        | 152168      | n/a       | n/a       |
| <b>Total</b>                                    | n/a            | 1474466     | 746245    | 728221    | n/a       | 3792934     | 220766    | 152168    |

249  
250  
251  
252

**Table S3.** Summary of the sequences from GenBank used to place new MAME 1 group within metazoans in Figure 5. The summary includes the accession number of the 18S rRNA gene sequence, the specie that it belongs and its taxonomy.

| <b>Taxonomy</b>        | <b>Specie</b>                        | <b>Accession Number</b> |
|------------------------|--------------------------------------|-------------------------|
| <b>Porifera</b>        | <i>Leucosolenia sp.</i>              | AJ622898                |
|                        | <i>Oscarella carmela</i>             | EU702422                |
|                        | <i>Aphrocallistes beatrix</i>        | FM946127                |
|                        | <i>Petrosia sp.</i>                  | DQ927321                |
| <b>Ctenophora</b>      | <i>Mertensia ovum</i>                | AF293679                |
|                        | <i>Pleurobrachia bachei</i>          | AF293677                |
|                        | <i>Mnemiopsis leidyi</i>             | AF293700                |
| <b>Placozoa</b>        | <i>Trichoplax sp.</i>                | Z22783                  |
| <b>Cnidaria</b>        | <i>Aurelia aurita</i>                | AY039208                |
|                        | <i>Coryne pusilla</i>                | Z86107                  |
|                        | <i>Alcyonium gracillimum</i>         | Z92902                  |
|                        | <i>Parazoanthus axinellae</i>        | U42453                  |
|                        | <i>Nematostella vectensis</i>        | AF254382                |
|                        | <i>Actinia equina</i>                | AJ133552                |
|                        | <i>Anemonia sulcata</i>              | X53498                  |
| <b>Acoelomorpha</b>    | <i>Paratomella rubra</i>             | AF102892                |
|                        | <i>Nemertoderma westbladi</i>        | AF327726                |
| <b>Xenoturbellida</b>  | <i>Xenoturbella bocki</i>            | AY291292                |
| <b>Hemichordata</b>    | <i>Saccoglossus pusillus</i>         | AF236800                |
|                        | <i>Balanoglossus carnosus</i>        | D14359                  |
|                        | <i>Glossobalanus minutus</i>         | AF119089                |
|                        | <i>Ptychodera flava</i>              | AF278681                |
| <b>Echinodermata</b>   | <i>Endoxocrinus parrae</i>           | Z80951                  |
|                        | <i>Antedon serrata</i>               | D14357                  |
|                        | <i>Strongylocentrotus purpuratus</i> | L28055                  |
|                        | <i>Asthenosoma owstoni</i>           | Z37118                  |
|                        | <i>Aquilonastra coronata</i>         | AB084566                |
|                        | <i>Astropecten latespinosus</i>      | AB084546                |
| <b>Cephalochordata</b> | <i>Branchiostoma floridae</i>        | M97571                  |
| <b>Craniata</b>        | <i>Urobatis jamaicensis</i>          | AY049861                |
|                        | <i>Mitsukurina owstoni</i>           | AY049840                |
| <b>Tunicata</b>        | <i>Oikopleura sp.</i>                | AB013015                |
|                        | <i>Oikopleura labradoriensis</i>     | FM244869                |
|                        | <i>Ascidia sydneiensis</i>           | AF165819                |
|                        | <i>Ciona intestinalis</i>            | AB013017                |
|                        | <i>Clavelina meridionalis</i>        | FM244840                |
|                        | <i>Pyrostremma spinosum</i>          | HQ015379                |
|                        | <i>Thalia sp.</i>                    | AB859895                |
|                        | <i>Salpidae sp.</i>                  | HQ015377                |
|                        | <i>Halocynthia igaboja</i>           | AY903925                |
|                        | <i>Cnemidocarpa humilis</i>          | FM244859                |

|                        |                                   |          |
|------------------------|-----------------------------------|----------|
|                        | <i>Molgula occidentalis</i>       | FM244850 |
|                        | <i>Molgula provisionalis</i>      | L12434.2 |
| <b>MAME 1</b>          | <i>Uncultured Eukaryote</i>       | KC582969 |
|                        | <i>Uncultured Eukaryote</i>       | HQ869055 |
| <b>Kinorhyncha</b>     | <i>Pycnophyes kielensis</i>       | U67997   |
| <b>Priapulida</b>      | <i>Halicryptus spinulosus</i>     | AF342790 |
|                        | <i>Priapulus caudatus</i>         | Z38009   |
|                        |                                   |          |
| <b>Nematomorpha</b>    | <i>Gordius albopunctatus</i>      | U88337   |
|                        | <i>Neochordodes occidentalis</i>  | AF421768 |
|                        | <i>Paragordius tricuspidatus</i>  | AF421771 |
| <b>Chaetognatha</b>    | <i>Eukrohnia bathypelagica</i>    | DQ351896 |
|                        | <i>Parasagitta setosa</i>         | DQ351900 |
|                        | <i>Sagitta bipunctata</i>         | DQ351890 |
| <b>Nematoda</b>        | <i>Enoplus brevis</i>             | U88336   |
|                        | <i>Desmodora ovigera</i>          | Y16913   |
|                        | <i>Catanema sp.</i>               | Y16912   |
| <b>Tardigrada</b>      | <i>Milnesium tardigradum</i>      | U49909   |
| <b>Arthropoda</b>      | <i>Colossendeis sp.</i>           | AF005440 |
|                        | <i>Pandinus imperator</i>         | AY210831 |
|                        | <i>Limulus polyphemus</i>         | L81949   |
|                        | <i>Lithobius obscurus</i>         | AF334271 |
|                        | <i>Orthoporus sp.</i>             | AY210829 |
|                        | <i>Heterothrips arisaemae</i>     | KC512970 |
|                        | <i>Ctenolepisma longicaudata</i>  | AY210811 |
|                        | <i>Triops longicaudatus</i>       | AF144219 |
|                        | <i>Orchesellides sinensis</i>     | KC236251 |
|                        | <i>Squilla empusa</i>             | L81946   |
| <b>Gnathostomulida</b> | <i>Haplognathia simplex</i>       | DQ079931 |
| <b>Bryozoa</b>         | <i>Fron dipora verrucosa</i>      | FJ409612 |
| <b>Gastrotricha</b>    | <i>Paraturbanella teissieri</i>   | JF357661 |
| <b>Entoprocta</b>      | <i>Barentsia benedeni</i>         | U36272   |
| <b>Cycliophora</b>     | <i>Symbion pandora</i>            | AY218106 |
| <b>Micrognathozoa</b>  | <i>Limnognathia maerski</i>       | AJ487046 |
| <b>Rotifera</b>        | <i>Philodina roseola</i>          | AF154567 |
|                        | <i>Brachionus plicatilis</i>      | U49911   |
|                        | <i>Lecane bulla</i>               | AF154566 |
|                        | <i>Asplanchna sieboldi</i>        | AF092434 |
| <b>Platyhelminthes</b> | <i>Catenula sp.</i>               | AJ012532 |
|                        | <i>Stenostomum leucops</i>        | D85095   |
|                        | <i>Macrostomum hystricinum</i>    | AF051329 |
|                        | <i>Haplopharynx rostratus</i>     | AJ012511 |
|                        | <i>Pseudoceros tritriatus</i>     | AJ228794 |
|                        | <i>Thysanozoon brocchii</i>       | D85096   |
|                        | <i>Planocera multitentaculata</i> | D83383   |

|                    |                              |          |
|--------------------|------------------------------|----------|
|                    | <i>Discocelis tigrina</i>    | U70078   |
|                    | <i>Notoplana australis</i>   | D85097   |
| <b>Nemertea</b>    | <i>Amphiporus ochraceus</i>  | AY039668 |
|                    | <i>Cerebratulus lacteus</i>  | AY145368 |
|                    | <i>Lineus ruber</i>          | AY039672 |
| <b>Mollusca</b>    | <i>Rhabdus rectius</i>       | AF120523 |
|                    | <i>Lima lima</i>             | AF120533 |
|                    | <i>Pteria hirundo</i>        | AF120532 |
|                    | <i>Nuculana minuta</i>       | DQ279938 |
|                    | <i>Yoldia myalis</i>         | AF207643 |
| <b>Brachiopoda</b> | <i>Glottidia palmeri</i>     | U12647   |
|                    | <i>Lingula anatina</i>       | X81631   |
|                    | <i>Phoronis australis</i>    | U36271   |
| <b>Annelida</b>    | <i>Urechis caupo</i>         | AF342805 |
|                    | <i>Aspidosiphon misakie</i>  | AF119090 |
|                    | <i>Phascolosoma granula</i>  | X79874   |
|                    | <i>Dero digitata</i>         | DQ459984 |
|                    | <i>Acanthobdella peledin</i> | AY040680 |
|                    | <i>Glossiphonia complana</i> | AF099943 |
|                    | <i>Erpobdella octoculata</i> | AF099949 |

253  
254  
255

**Table S4.** Summary of reads and OTUs obtained within all metazoan phyla in BioMarks data.

| Metazoan Phyla   | OTUs      | Reads         | Metazoan Phyla      | OTUs       | Reads          |
|------------------|-----------|---------------|---------------------|------------|----------------|
| Porifera         | 13        | 262           | Priapulida          | 2          | 117            |
| Ctenophora       | 10        | <b>23,371</b> | Kinorhyncha         | 3          | 2,291          |
| Cnidaria         | <b>55</b> | <b>18,627</b> | Nematoda            | <b>247</b> | <b>8,932</b>   |
| Acoelomorpha     | <b>31</b> | 3,069         | Tardigrada          | 3          | 8              |
| Gastrotricha     | <b>23</b> | 1,540         | <b>Arthropoda</b>   |            |                |
| Gnathostomulida  | 1         | 33            | Myriapoda           | 1          | 190            |
| Rotifera         | 12        | <b>3,576</b>  | Hexapoda            | 3          | 12             |
| Bryozoa          | 12        | 1,055         | Crustacea           | <b>370</b> | <b>190,872</b> |
| Phoronida        | 1         | 306           | Chelicerata         | 7          | 575            |
| Platyhelminthes  | <b>33</b> | 1,540         | <b>Chaetognatha</b> | <b>21</b>  | <b>14,739</b>  |
| Nemertea         | 7         | 622           | Xenoturbellida      | 1          | 15             |
| Mollusca         | <b>53</b> | <b>9,907</b>  | Echinodermata       | 16         | 3,206          |
| <b>Annelida</b>  |           |               | Hemichordata        | 2          | 123            |
| Polychaeta       | <b>97</b> | <b>34,693</b> | Craniata            | 14         | 1,961          |
| Clitellata       | 1         | 5             | <b>Tunicata</b>     | <b>30</b>  | <b>37,982</b>  |
| <i>Sipuncula</i> | 3         | 681           | <b>MAME 1</b>       | 3          | 1,860          |



256  
257  
258

**Table S5.** Summary of the 20 most abundant metazoan OTUs in the water column taking into account the number of RNA reads.

| Metazoan group      | OTU | RNA reads | % <sup>a</sup> within metaz. | % <sup>b</sup> within group | CIM <sup>c</sup> | CIM BLAST % ID <sup>d</sup> | CIM taxonomy                                          |
|---------------------|-----|-----------|------------------------------|-----------------------------|------------------|-----------------------------|-------------------------------------------------------|
| <b>Crustacea</b>    | 6   | 10746     | 9.8%                         | 22.0%                       | HM997070         | 100%                        | <i>Paracalanus parvus</i> (Calanoida, Copepod)        |
|                     | 2   | 7944      | 7.3%                         | 16.3%                       | JX995318         | 100%                        | <i>Calanus helgolandicus</i> (Calanoida, Copepod)     |
|                     | 21  | 4834      | 4.4%                         | 9.9%                        | JX995321         | 100%                        | <i>Pseudocalanus elongatus</i> (Calanoida, Copepod)   |
|                     | 11  | 3545      | 3.3%                         | 7.3%                        | JX995298         | 100%                        | <i>Centropages typicus</i> (Calanoida, Copepod)       |
|                     | 15  | 3093      | 2.8%                         | 6.3%                        | HM997062         | 100%                        | <i>Temora discaudata</i> (Calanoida, Copepod)         |
|                     | 84  | 2796      | 2.6%                         | 5.7%                        | HM997079         | 98%                         | <i>Clausocalanus arcuicornis</i> (Calanoida, Copepod) |
|                     | 224 | 2679      | 2.5%                         | 5.5%                        | HM997079         | 99%                         | <i>Clausocalanus arcuicornis</i> (Calanoida, Copepod) |
|                     | 22  | 2219      | 2.0%                         | 4.5%                        | JF781540         | 98%                         | <i>Oithona sp.</i> (Cyclopoida, Copepod)              |
|                     | 8   | 1865      | 1.7%                         | 3.8%                        | GU969179         | 100%                        | <i>Oithona Similis</i> (Cyclopoida, Copepod)          |
| <b>Total</b>        |     | 39721     | 36.4%                        | 81.2%                       |                  |                             |                                                       |
| <b>Tunicata</b>     | 4   | 21436     | 19.6%                        | 56.6%                       | AB013014         | 100%                        | <i>Oikopleura dioica</i> (Appendicularian)            |
|                     | 39  | 1723      | 1.6%                         | 4.6%                        | AY116613         | 100%                        | <i>Oikopleura dioica</i> (Appendicularian)            |
|                     | 169 | 1082      | 1.0%                         | 2.9%                        | AB013012         | 100%                        | <i>Doliolum nationalis</i> (Doliolid)                 |
| <b>Total</b>        |     | 24241     | 22.2%                        | 64.0%                       |                  |                             |                                                       |
| <b>Ctenophora</b>   | 7   | 12031     | 11.0%                        | 83.5%                       | AF100944         | 100%                        | <i>Pleurobrachia pileus</i> (Typhlocoela)             |
|                     | 52  | 2108      | 1.9%                         | 14.6%                       | AF293700         | 100%                        | <i>Lamproteus cruentiventer</i> (Cyclocoela)          |
| <b>Total</b>        |     | 22387     | 12.9%                        | 98.2%                       |                  |                             |                                                       |
| <b>Chaetognatha</b> | 49  | 3736      | 3.4%                         | 42.3%                       | DQ351879         | 99%                         | <i>Krohnitta pacifica</i> (Saggitioidea)              |
|                     | 80  | 3285      | 3.0%                         | 37.2%                       | DQ351877         | 99%                         | <i>Flaccisagitta enflata</i> (Saggitioidea)           |
| <b>Total</b>        |     | 7021      | 6.4%                         | 79.5%                       |                  |                             |                                                       |
| <b>Cnidaria</b>     | 79  | 2114      | 1.9%                         | 46.3%                       | AY039208         | 100%                        | <i>Aurelia aurita</i> (Scyphozoa)                     |
|                     | 50  | 1887      | 1.7%                         | 41.3%                       | DQ080014         | 100%                        | <i>Lilyopsis rosea</i> (Hydrozoa)                     |
| <b>Total</b>        |     | 4001      | 3.7%                         | 87.6%                       |                  |                             |                                                       |
| <b>Rotifera</b>     | 116 | 2573      | 2.4%                         | 86.9%                       | DQ297711         | 99%                         | <i>Notommata cordonella</i> (Ploimida)                |
| <b>MAME 1</b>       | 102 | 1093      | 1.0%                         | 65.1%                       | HQ869055*        | 95%                         | <i>Uncultured eukaryote</i> *                         |

259  
260  
261  
262  
263  
264

a. Percentage of RNA reads within the metazoans in the water column.

b. Percentage of RNA reads within the correspondent in the water column.

c. Accession number of the Closest Identified Match.

d. BLAST identity.

\* The Closest Identified Match match has a very low identity (less than 90%). It is indicated instead, the Closest Environmental Match (CEM).

265 **Table S6.** Summary of the 20 most abundant metazoan OTUs in the sediments taking into account  
 266 the number of RNA reads.  
 267

| Metazoan group  | OTU | RNA reads | % <sup>a</sup> within metaz. | % <sup>b</sup> within group | CIM <sup>c</sup> | CIM BLAST % ID <sup>d</sup> | CIM taxonomy                                    |
|-----------------|-----|-----------|------------------------------|-----------------------------|------------------|-----------------------------|-------------------------------------------------|
| Polychaeta      | 61  | 1823      | 5.2%                         | 22.7%                       | EU340097         | 99%                         | <i>Aurospio foodbancsia</i> (Spionida)          |
|                 | 89  | 1742      | 5.0%                         | 21.7%                       | JF903633         | 100%                        | <i>Prosphaerosyllis magnoculata</i> (Aciculata) |
|                 | 88  | 1423      | 4.1%                         | 17.7%                       | JN936464         | 92%                         | <i>Paralysippe annectens</i> (Scolecida)        |
|                 | 26  | 643       | 1.9%                         | 8.0%                        | AF412798         | 99%                         | <i>Parougia sp.</i> (Aciculata)                 |
|                 | 36  | 495       | 1.4%                         | 6.2%                        | JN936464         | 92%                         | <i>Paralysippe annectens</i> (Scolecida)        |
|                 | 69  | 389       | 1.1%                         | 4.8%                        | AY838852         | 100%                        | <i>Ninoe nigripes</i> (Aciculata)               |
|                 | 229 | 388       | 1.1%                         | 4.8%                        | AY611455         | 100%                        | <i>Polydora giardi</i> (Scolecida)              |
| <b>Total</b>    |     | 6903      | 19.8%                        | 85.8%                       |                  |                             |                                                 |
| Crustacea       | 68  | 2900      | 8.3%                         | 36.7%                       | AB076635         | 98%                         | <i>Limnocythere sp.</i> (Ostracoda)             |
|                 | 211 | 802       | 2.3%                         | 10.2%                       | AB076621         | 89%                         | <i>Kotoracythere inconspicua</i> (Ostracoda)    |
|                 | 273 | 458       | 1.3%                         | 5.8%                        | EU380309         | 97%                         | <i>Itunella muelleri</i> (Copepoda)             |
|                 | 216 | 458       | 1.3%                         | 5.8%                        | AY627016         | 100%                        | <i>Brayda sp.</i> (Copepoda)                    |
|                 | 76  | 399       | 1.2%                         | 5.1%                        | AB076631         | 100%                        | <i>Leptocythere lacertosa</i> (Ostracoda)       |
|                 | 260 | 326       | 0.9%                         | 4.1%                        | EU380293         | 97%                         | <i>Paramphiascella fulvofasciata</i> (Copepoda) |
| <b>Total</b>    |     | 5343      | 15.3%                        | 67.6%                       |                  |                             |                                                 |
| Mollusca        | 18  | 5389      | 15.5%                        | 82.9%                       | DQ279940         | 100%                        | <i>Abra nitida</i> (Bivalvia)                   |
|                 | 67  | 847       | 2.4%                         | 13.0%                       | EF489348         | 100%                        | <i>Scaphander lignarius</i> (Gastropoda)        |
| <b>Total</b>    |     | 6236      | 17.9%                        | 95.9%                       |                  |                             |                                                 |
| Platyhelminthes | 74  | 1427      | 4.1%                         | 48.3%                       | FJ715296         | 99%                         | <i>Microstomum papillosum</i> (Rhabditophora)   |
| Echinodermata   | 51  | 1159      | 3.3%                         | 92.8%                       | AJ011142         | 99%                         | <i>Amphiura chiajei</i> (Ophiurida)             |
| Nematoda        | 176 | 624       | 1.8%                         | 12.5%                       | AJ966473         | 94%                         | <i>Anaplectus sp.</i> (Chromadorea)             |
| Sipuncula       | 340 | 500       | 1.4%                         | 91.2%                       | AF519248         | 100%                        | <i>Phascolion strombus</i> (Golfingiida)        |
| Cnidaria        | 50  | 337       | 1.0%                         | 67.4%                       | DQ080014         | 100%                        | <i>Lilyopsis rosea</i> (Hydrozoa)               |

268  
 269  
 270  
 271

- a. Percentage of RNA reads within the metazoans in the sediments.  
 b. Percentage of RNA reads within the correspondent in the sediments.  
 c. Accession number of the Closest Identified Match.  
 d. BLAST identity.

272 **Table S7.** Summary of the OTUs, whose RNA reads from small fractions are suspected  
 273 to come from gametes.  
 274

| Distribution                                 | Metazoan group | OTU  | Reads <sup>c</sup> within small fraction | % <sup>d</sup> within dataset | CIM      | CIM BLAST % ID. | CIM taxonomy                               |
|----------------------------------------------|----------------|------|------------------------------------------|-------------------------------|----------|-----------------|--------------------------------------------|
| <b>Small and large fractions<sup>a</sup></b> | Ctenophora     | 7    | 11201                                    | 50.3%                         | AF100944 | 100%            | <i>Pleurobrachia pileus</i> (Typhlocoela)  |
|                                              | Cnidaria       | 79   | 1589                                     | 7.1%                          | AY039208 | 100%            | <i>Aurelia aurita</i> (Scyphozoa)          |
|                                              | <b>Total</b>   |      | <b>12790</b>                             | <b>57.5%</b>                  |          |                 |                                            |
| <b>Small exclusive<sup>b</sup></b>           | Polychaeta     | 88   | 340                                      | 1.5%                          | JN936464 | 92%             | <i>Paralysippe annectens</i> (Scolecida)   |
|                                              | Ctenophora     | 52   | 212                                      | 1.0%                          | KJ754158 | 100%            | <i>Mnemiopsis leidy</i> (Cyclocoela)       |
|                                              | Ctenophora     | 5798 | 104                                      | 0.5%                          | KJ754154 | 98%             | <i>Pleurobrachia brunnea</i> (Typhlocoela) |
|                                              | Ctenophora     | 715  | 77                                       | 0.4%                          | HG931678 | 96%             | <i>Beroe ovata</i> (Cyclocoela)            |
|                                              | Polychaeta     | 19   | 70                                       | 0.3%                          | AY611452 | 88%             | <i>Hydroides novegica</i> (Palpata)        |
|                                              | <b>Total</b>   |      | <b>803</b>                               | <b>3.6%</b>                   |          |                 |                                            |
| <b>TOTAL<sup>e</sup></b>                     |                |      | <b>13593</b>                             | <b>3.2%<sup>e</sup></b>       |          |                 |                                            |

- 275 a. OTUs that are present in pico/nano and micro/meso fractions.  
 276 b. The 5 most abundant OTUs exclusive from the pico/nano fractions.  
 277 c. Number of RNA reads within the pico/nano fractions.  
 278 d. Percentage of RNA reads within the pico/nano fractions for metazoans.  
 279 e. Percentage of RNA reads within the pico/nano fractions for all eukaryotes.  
 280

## Dataset specs

### Templates

DNA

RNA

### Sample fractions

Picoplankton (0.8–3  $\mu\text{m}$ )

Nanoplankton (3–20  $\mu\text{m}$ )

Micro/mesoplankton (20–2,000  $\mu\text{m}$ )

Sediments (total)

### Depth

Subsurface

DCM

Sediments

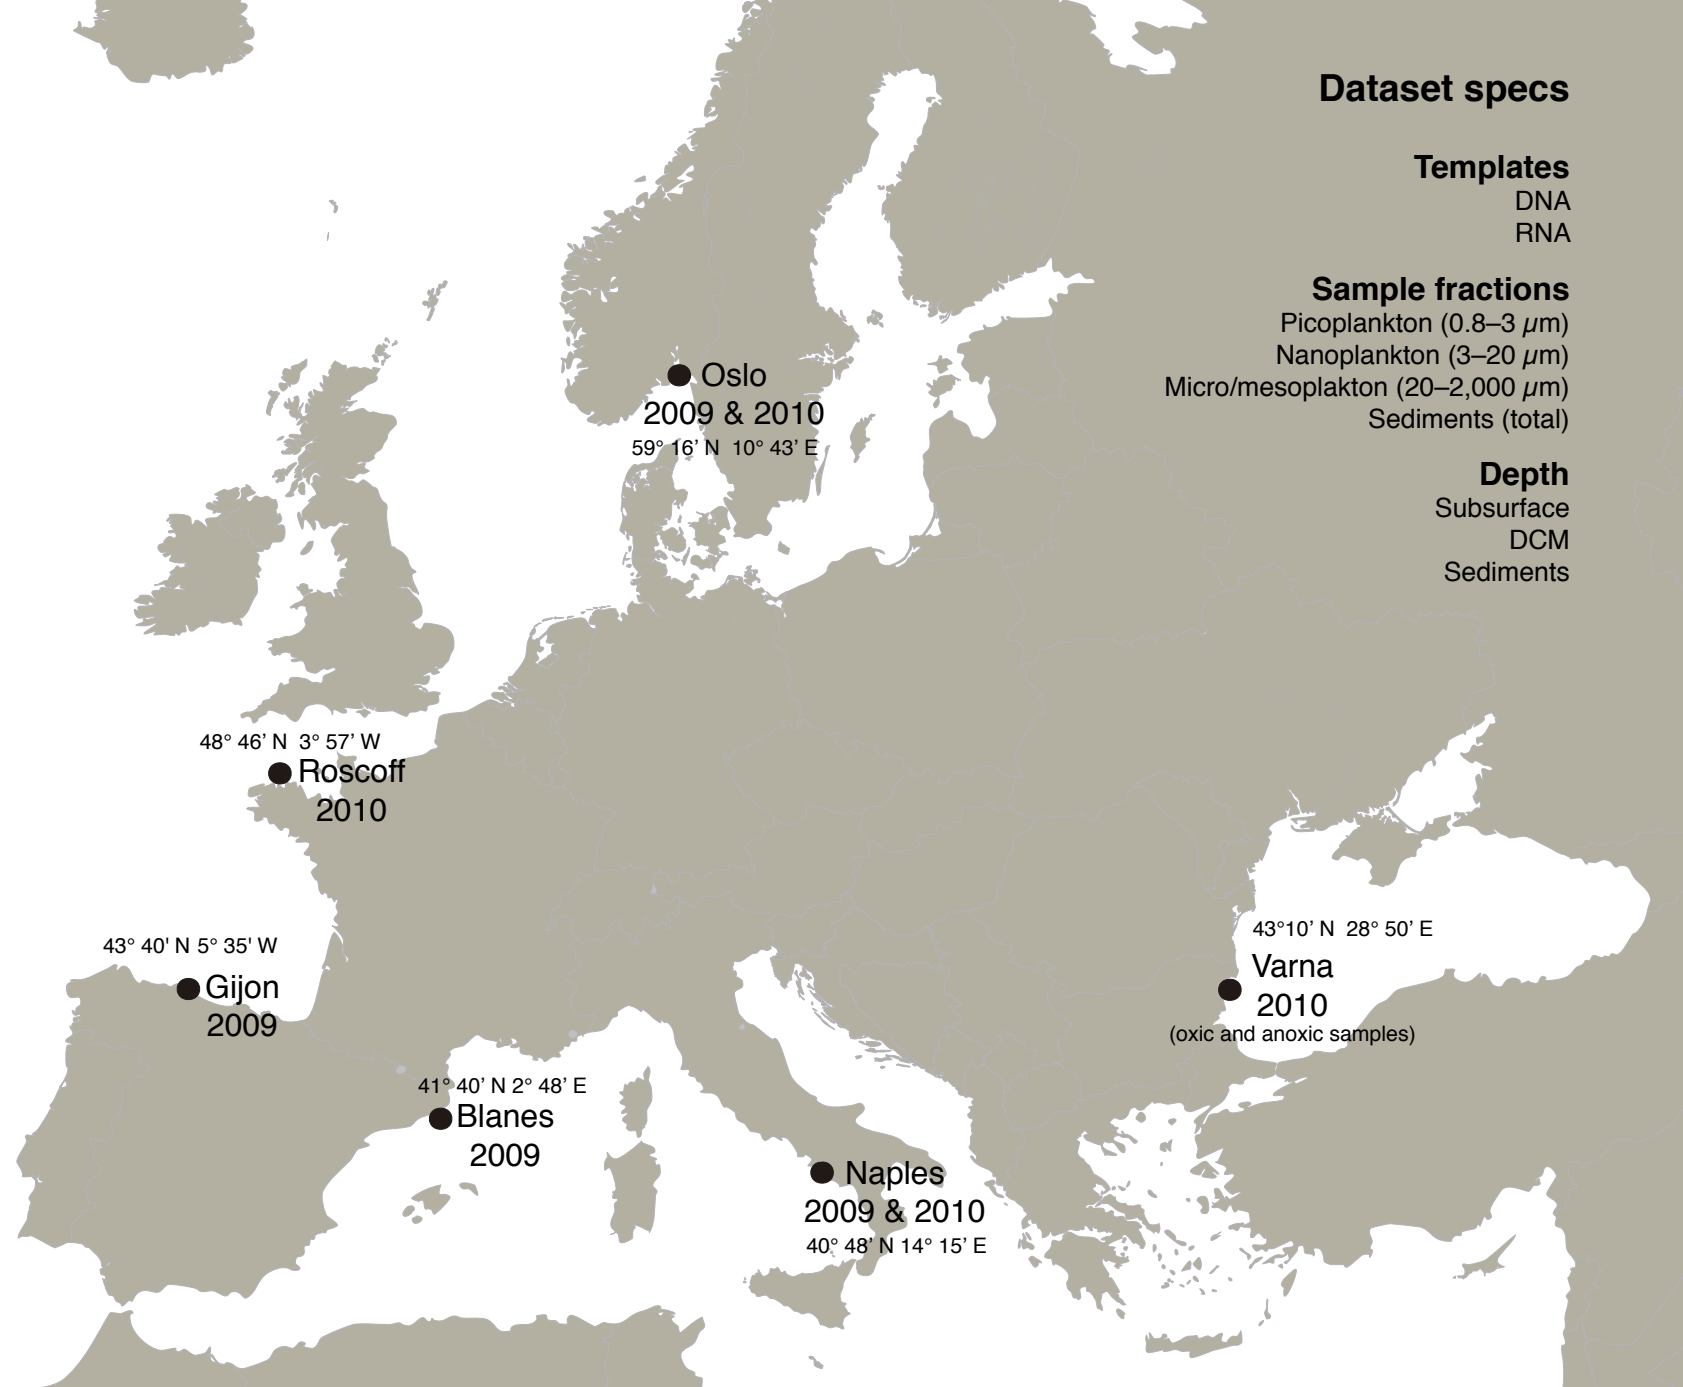

**(a)**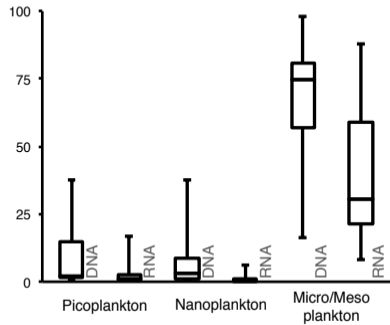**(b)**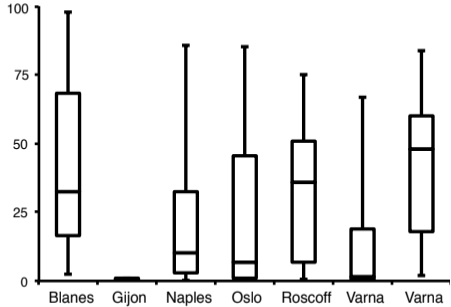**(c)**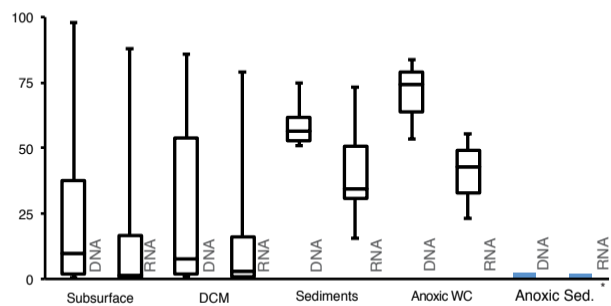

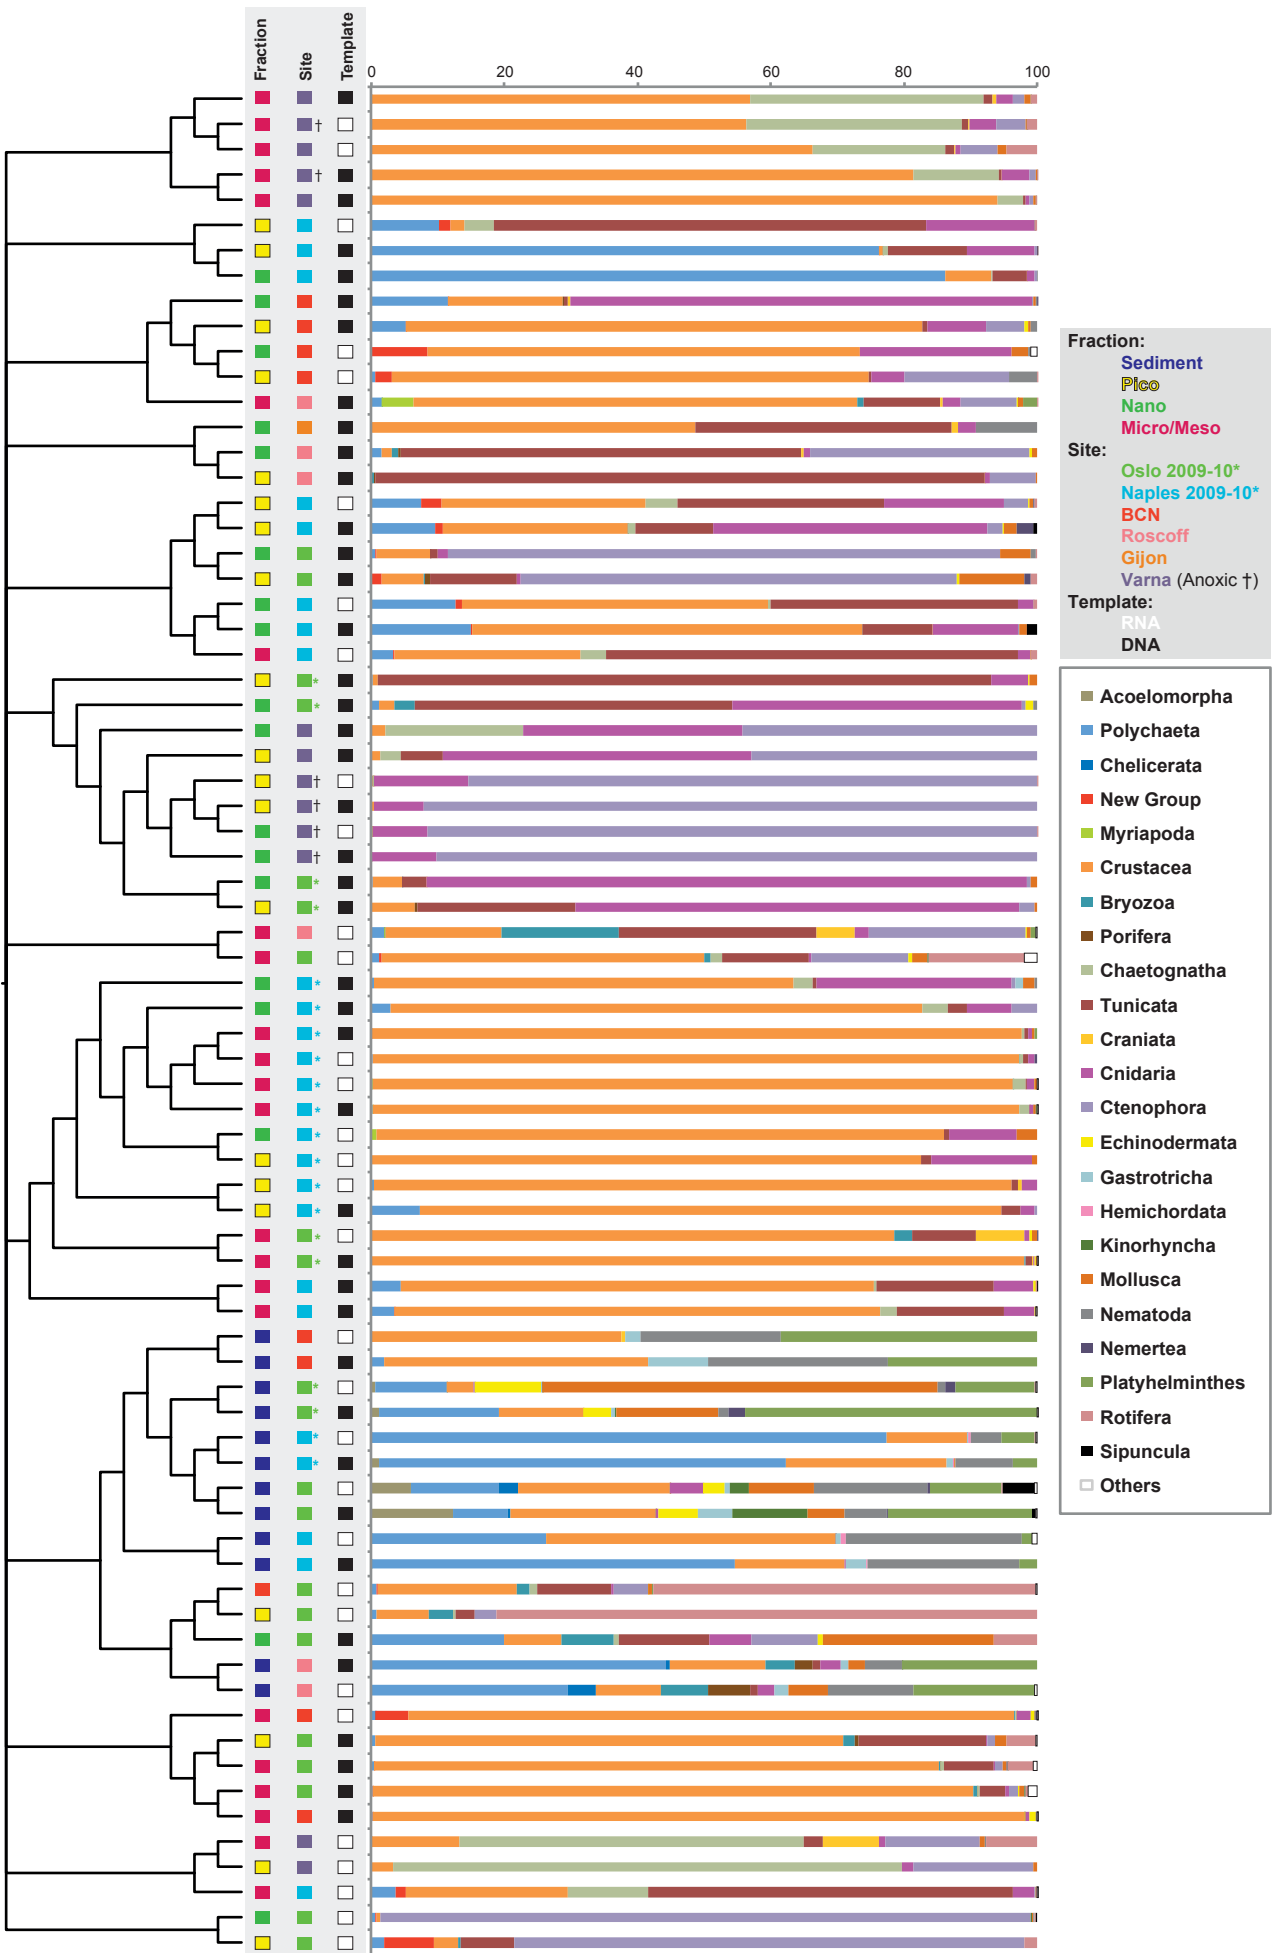

**(a)**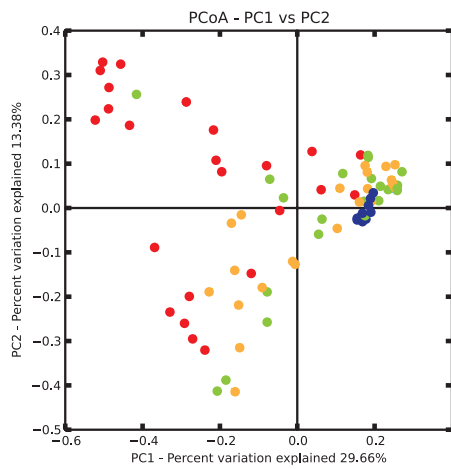

Picoplankton

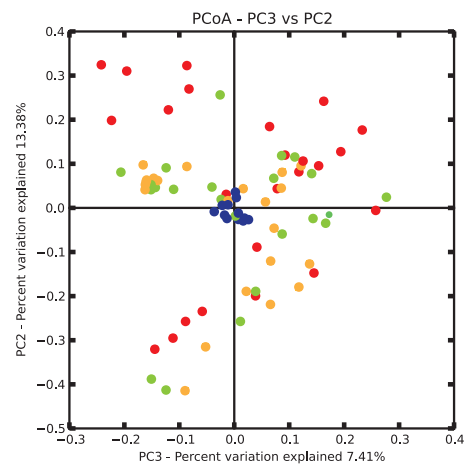

Nanoplankton

Micro/Mesoplankton

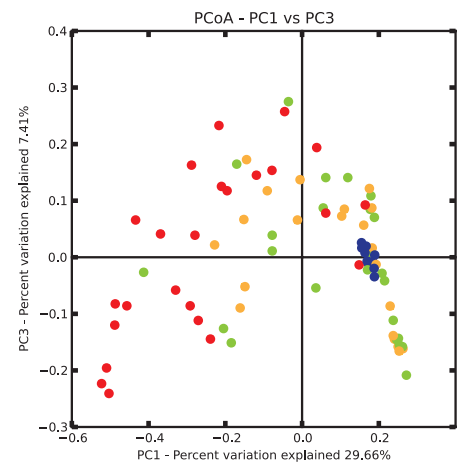

Sediment

**(b)**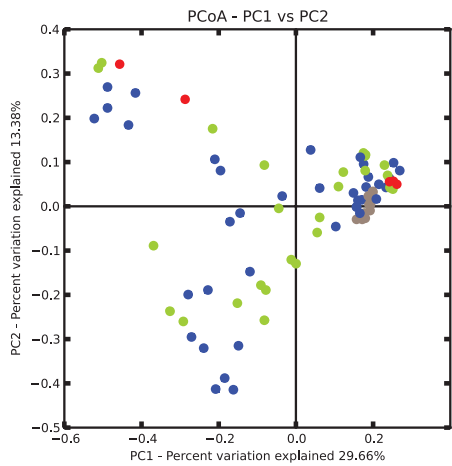

Subsurface

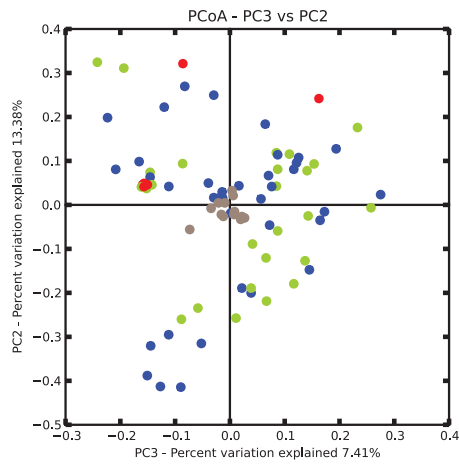

DCM

Anoxic

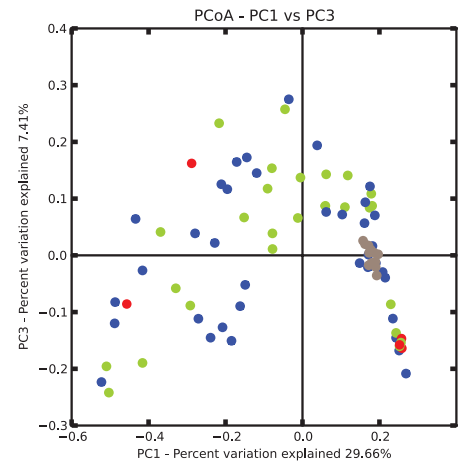

Sediment

**(c)**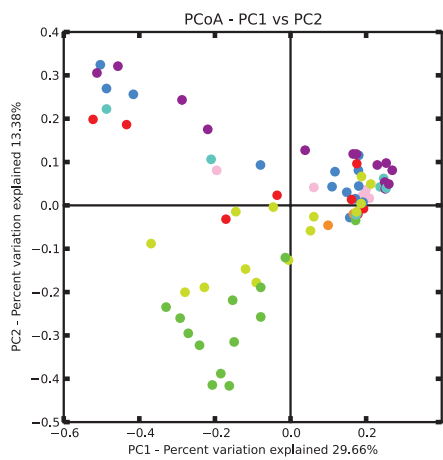

Blanes

Gijon

Naples\_2009

Naples\_2010

Oslo\_2009

Oslo\_2010

Roscoff

Varna

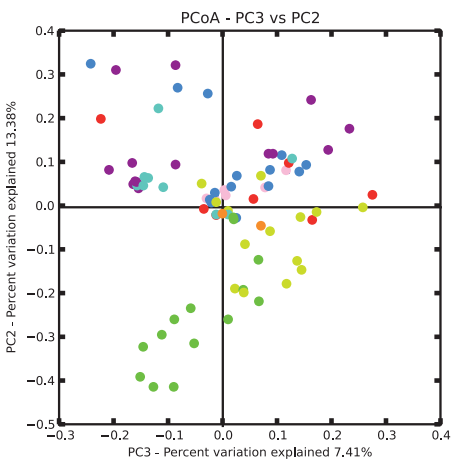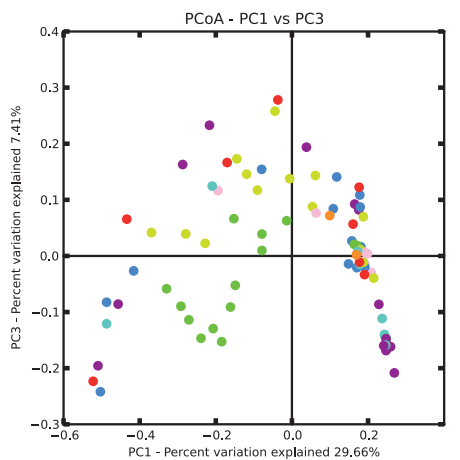

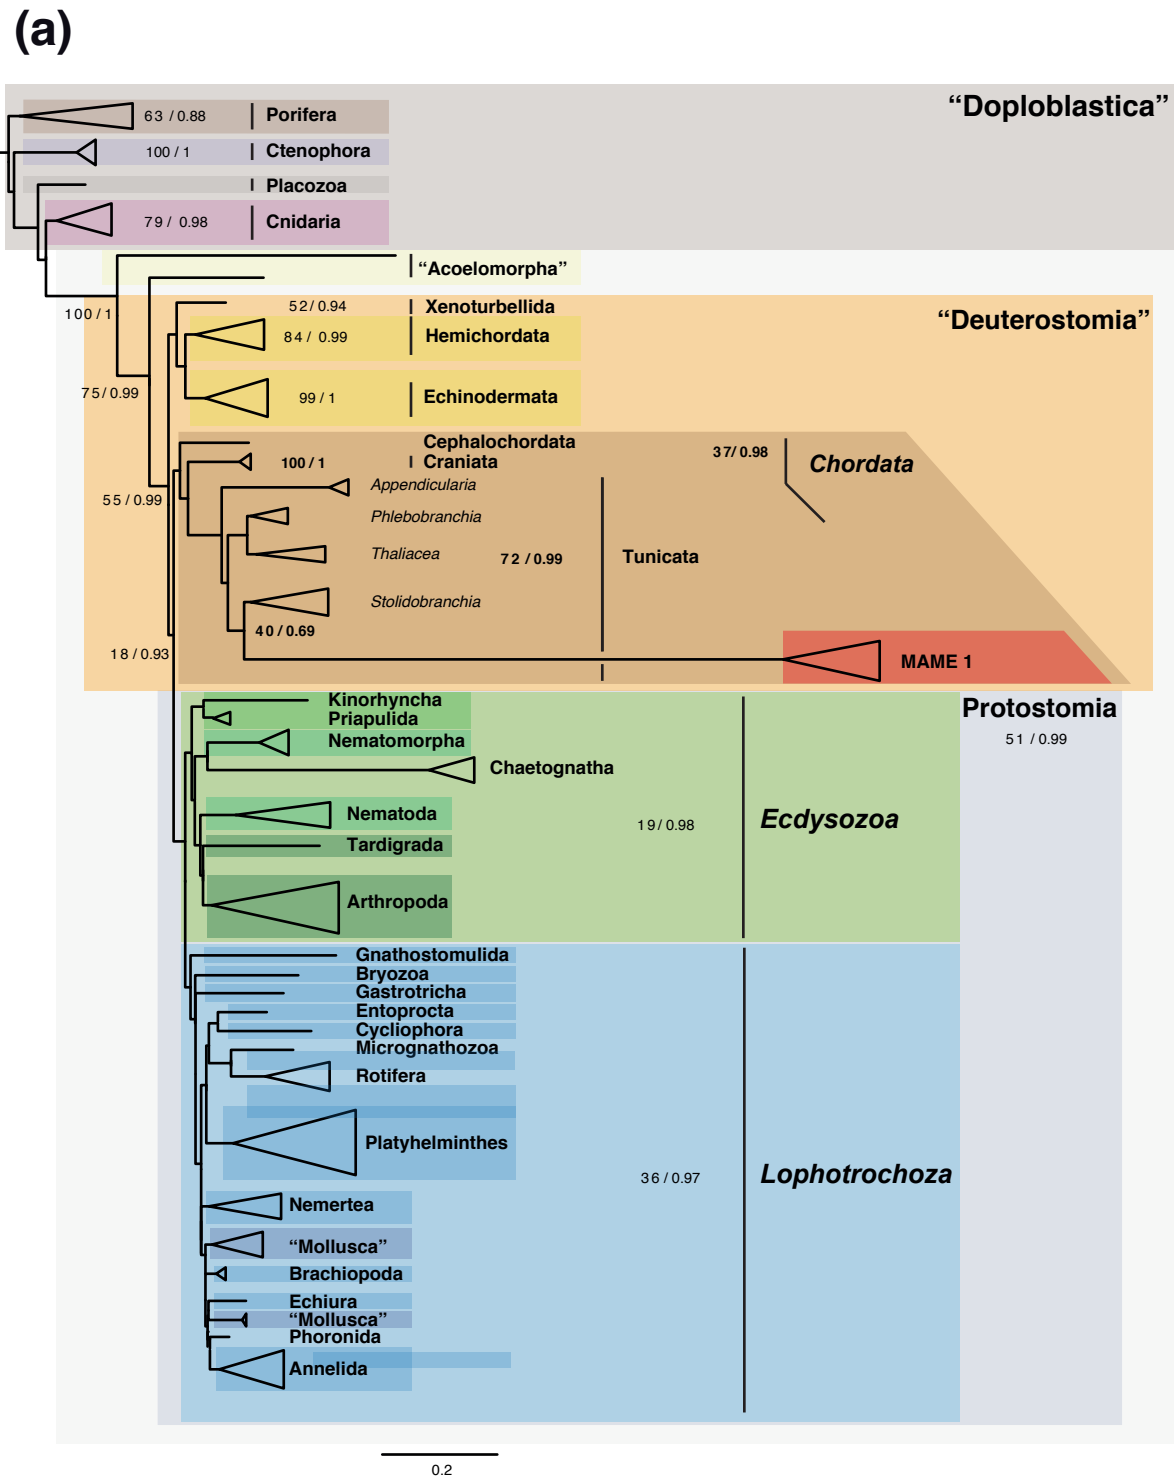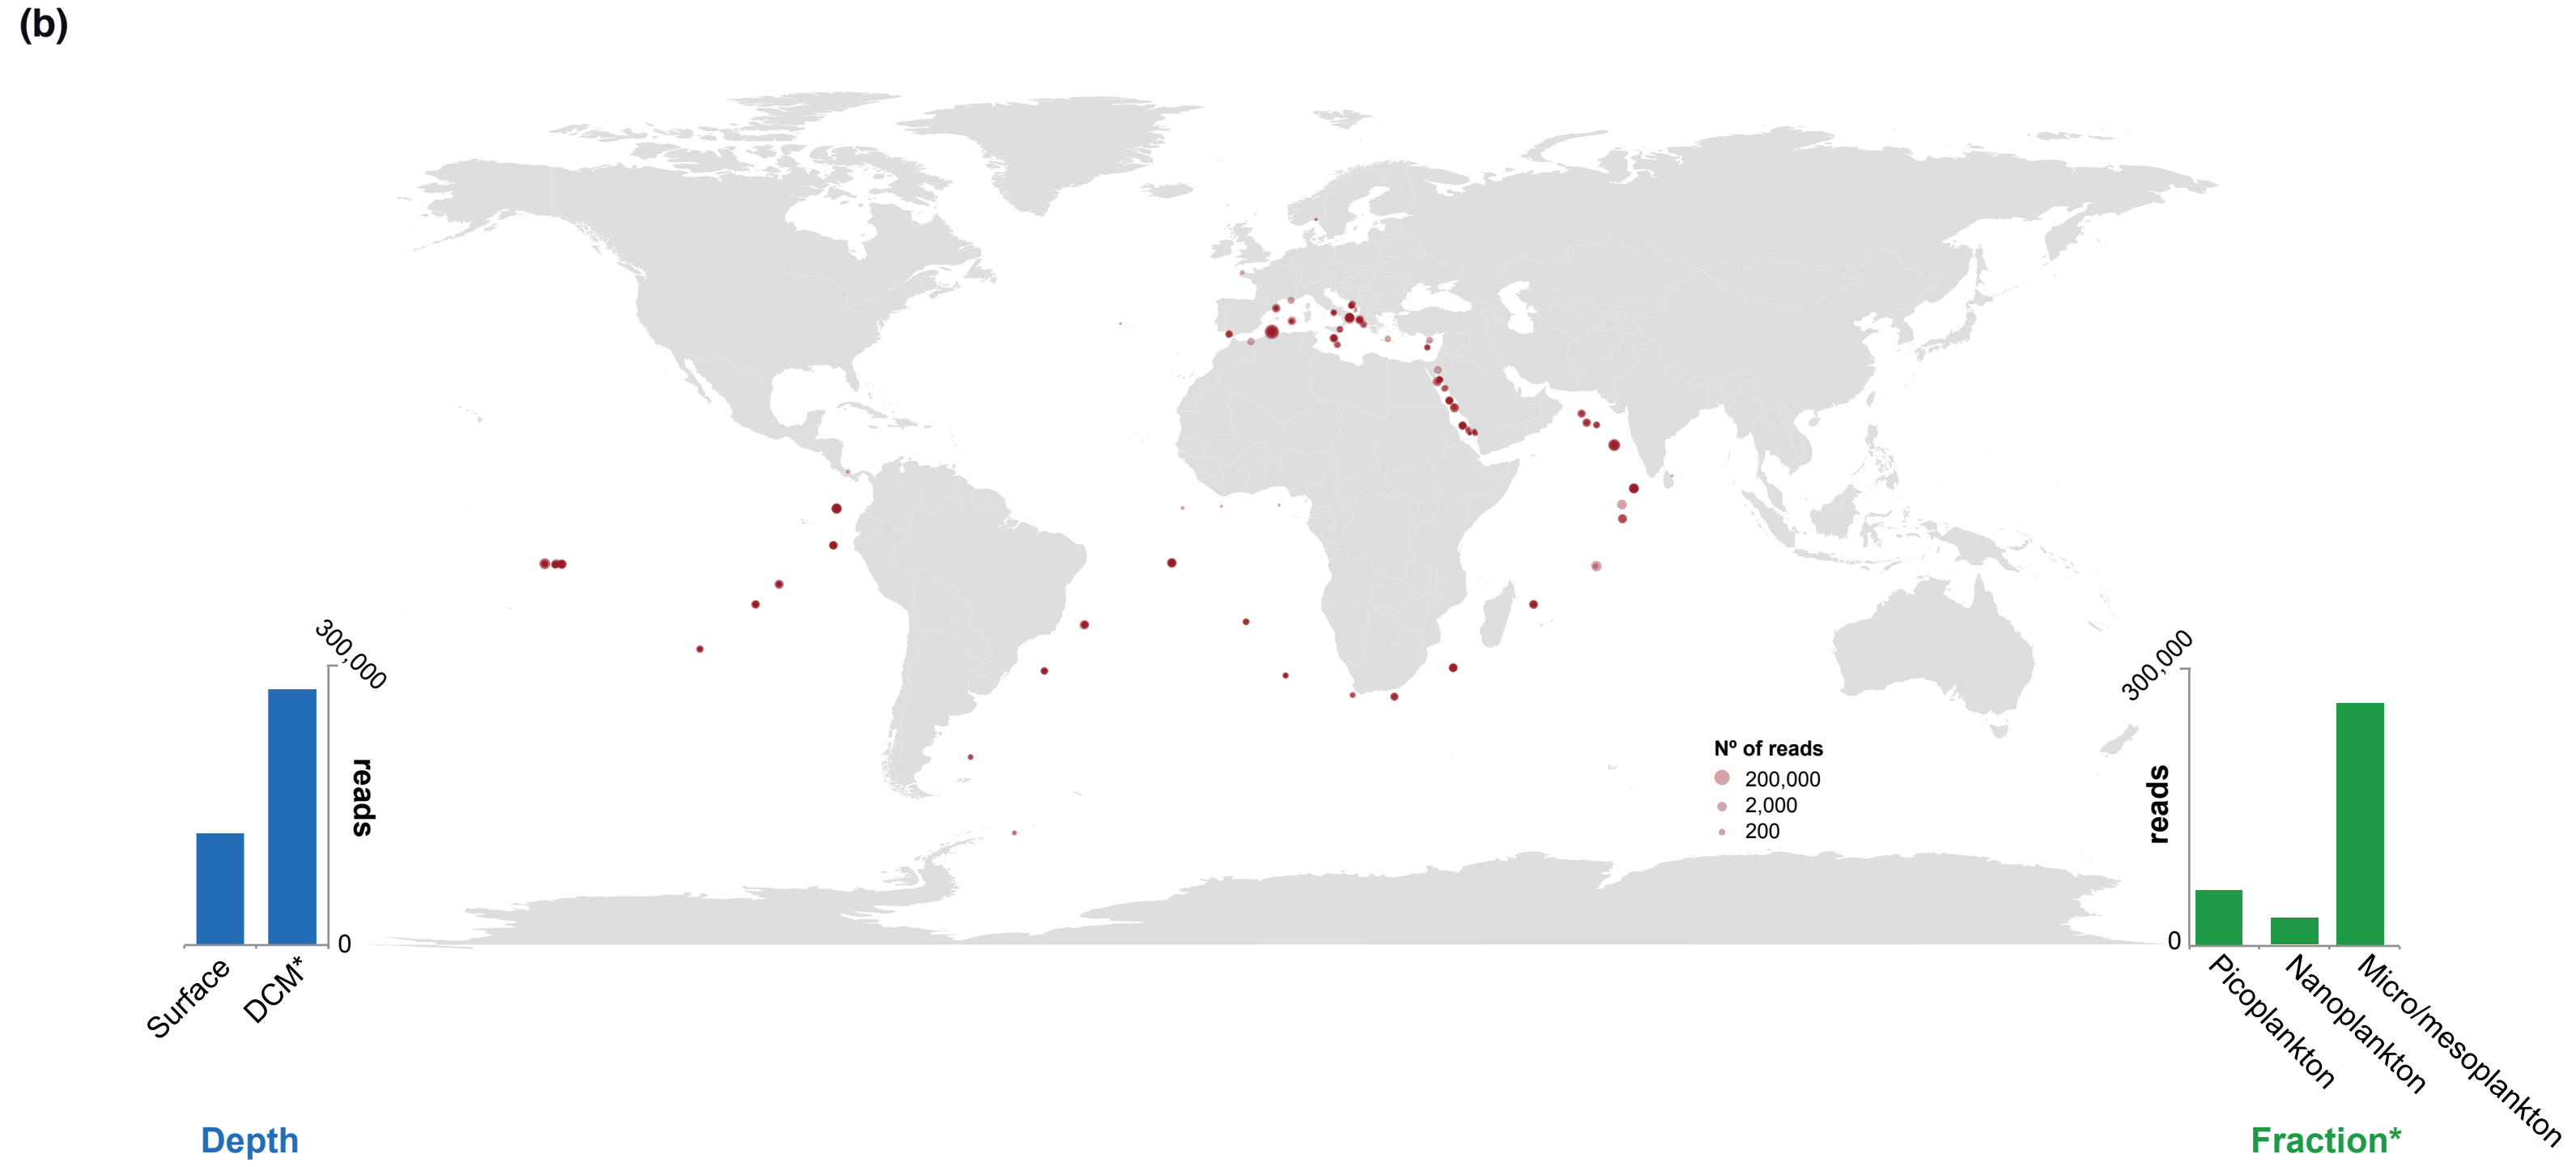





**(a)**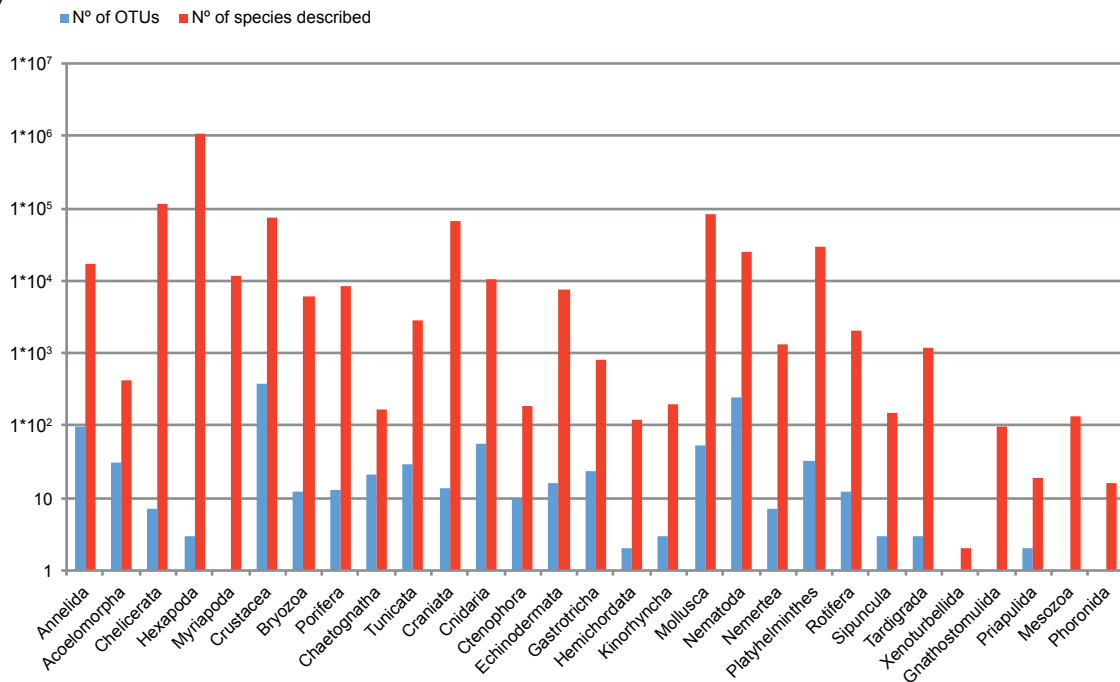**(b)**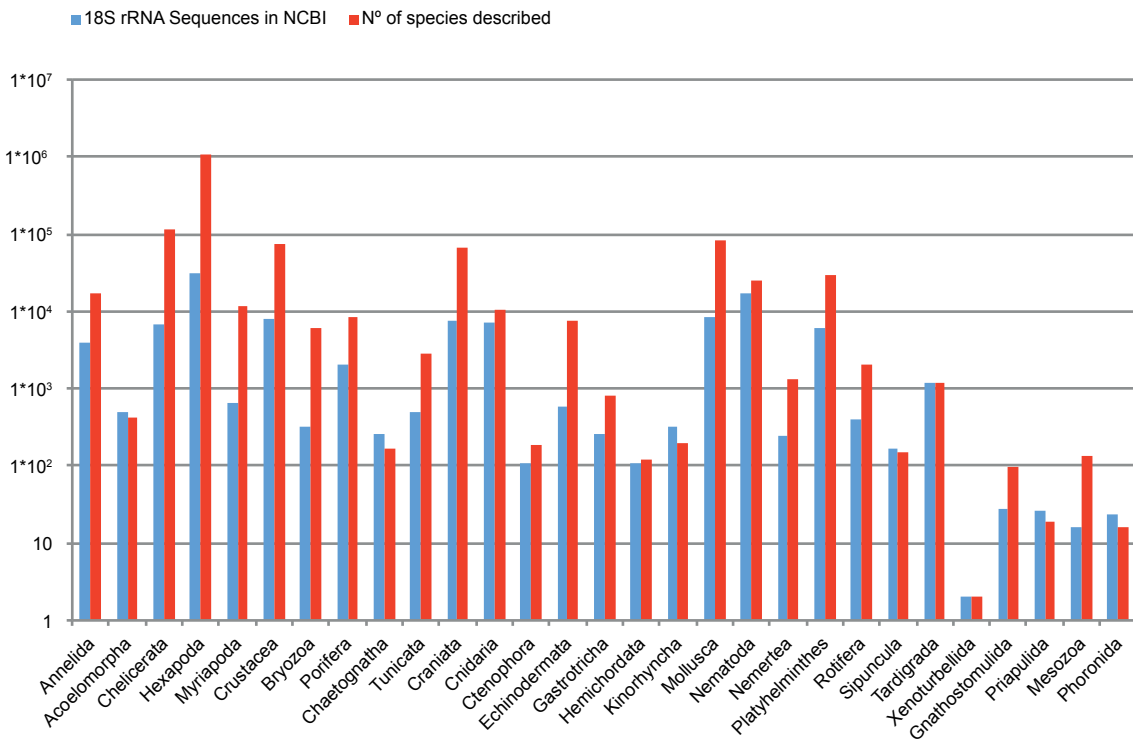

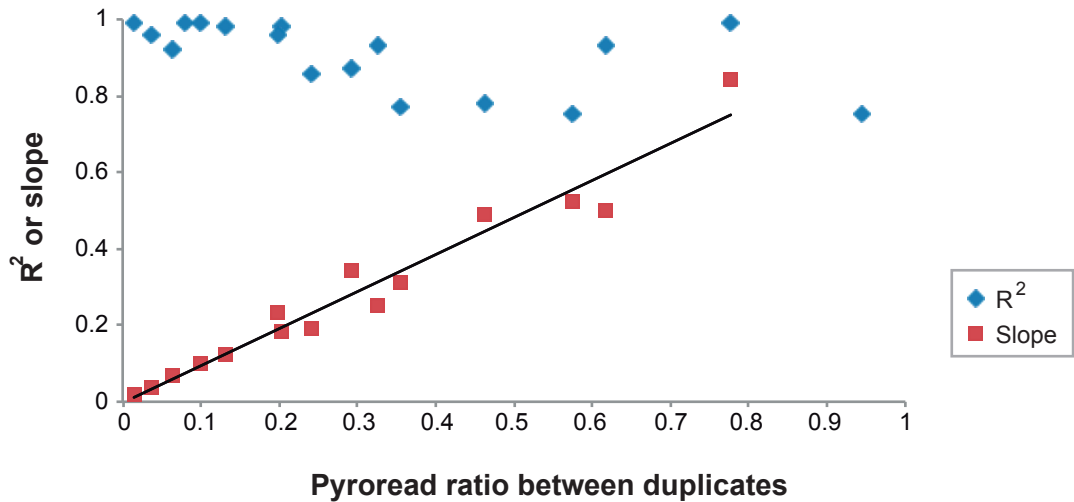

Supplement: Supplementary file [file 253146-1.pdf]
